# Supplementary material
Source: PubMed Central journal article supplement (PMC6329384)
Supplement: NIHMS1000546-supplement-Figure_1.pdf [file NIHMS1000546-supplement-Figure_1.pdf]

## Supplemental Figure S1.

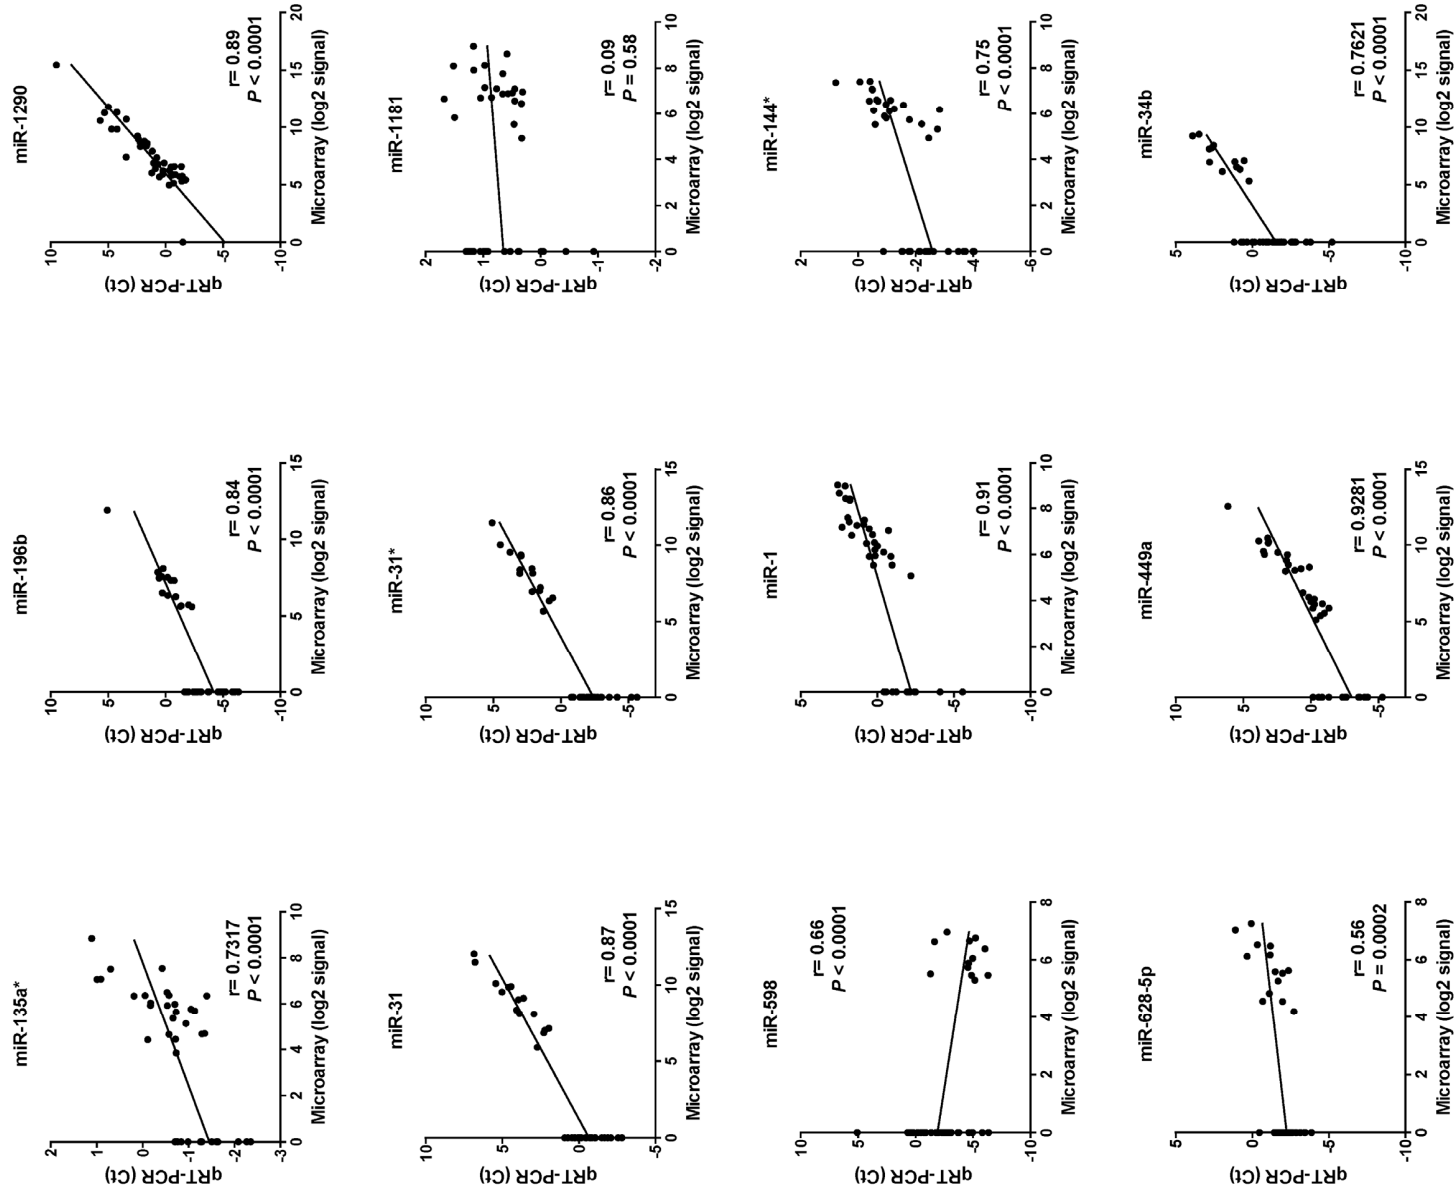

Supplemental Figure S1. Correlation of microarray data with quantitative RT-PCR data for 12-miRNAs expression in the test cohort. Expression levels of miRNAs assessed by qRT-PCR are shown by relative threshold cycle values against *RNU66*, a control gene. Expression levels of miRNAs assessed by microarray are shown by log2 signals.  $P$ -values by Spearman  $r$  test are shown.
