# Supplementary material
Source: PubMed Central journal article supplement (PMC6329384)
Supplement: NIHMS1000546-supplement-Figure_2.pdf [file NIHMS1000546-supplement-Figure_2.pdf]

## Supplemental Figure S2.

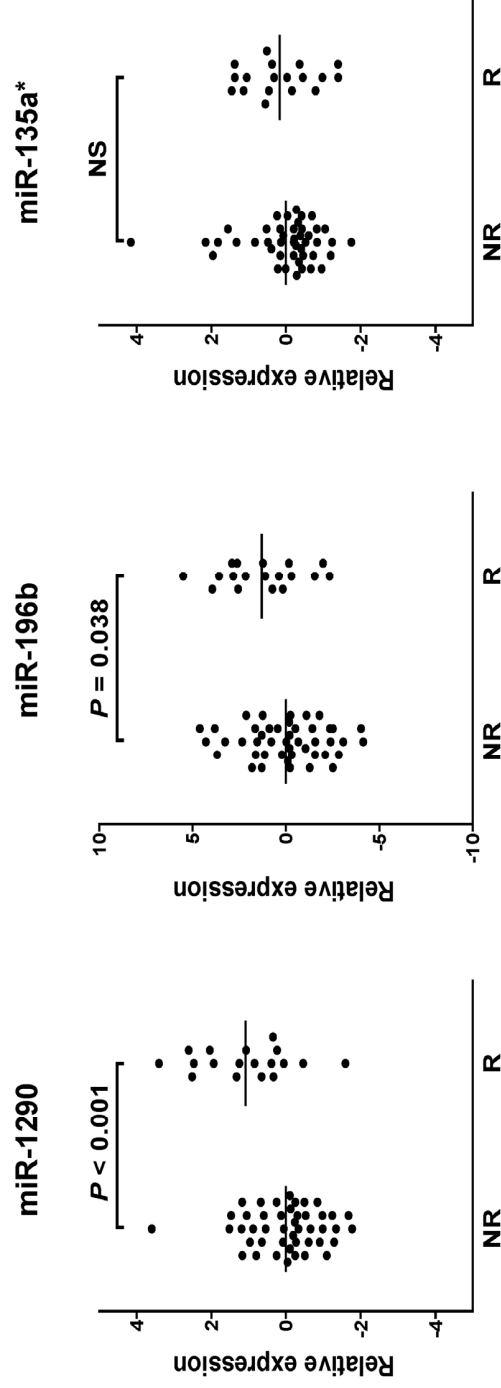

Supplemental Figure S2. Expression of miRNAs in non-responders (NR) and responders (R) in the validation cohort as measured by qRT-PCR. Dot plots represent miRNA relative threshold cycle values. Expression levels were normalized to that of RNU66. Relative threshold cycle values  $>0$  in R indicate that expression was higher than the mean value in NR (log2 scale). Horizontal bars indicate the mean expression value. *P*-values (Mann–Whitney test) are indicated. NS: not significant.
