# Supplementary material
Source: PubMed Central journal article supplement (PMC6329384)
Supplement: NIHMS1000546-supplement-Figure_3.pdf [file NIHMS1000546-supplement-Figure_3.pdf]

# Supplemental Figure S3.

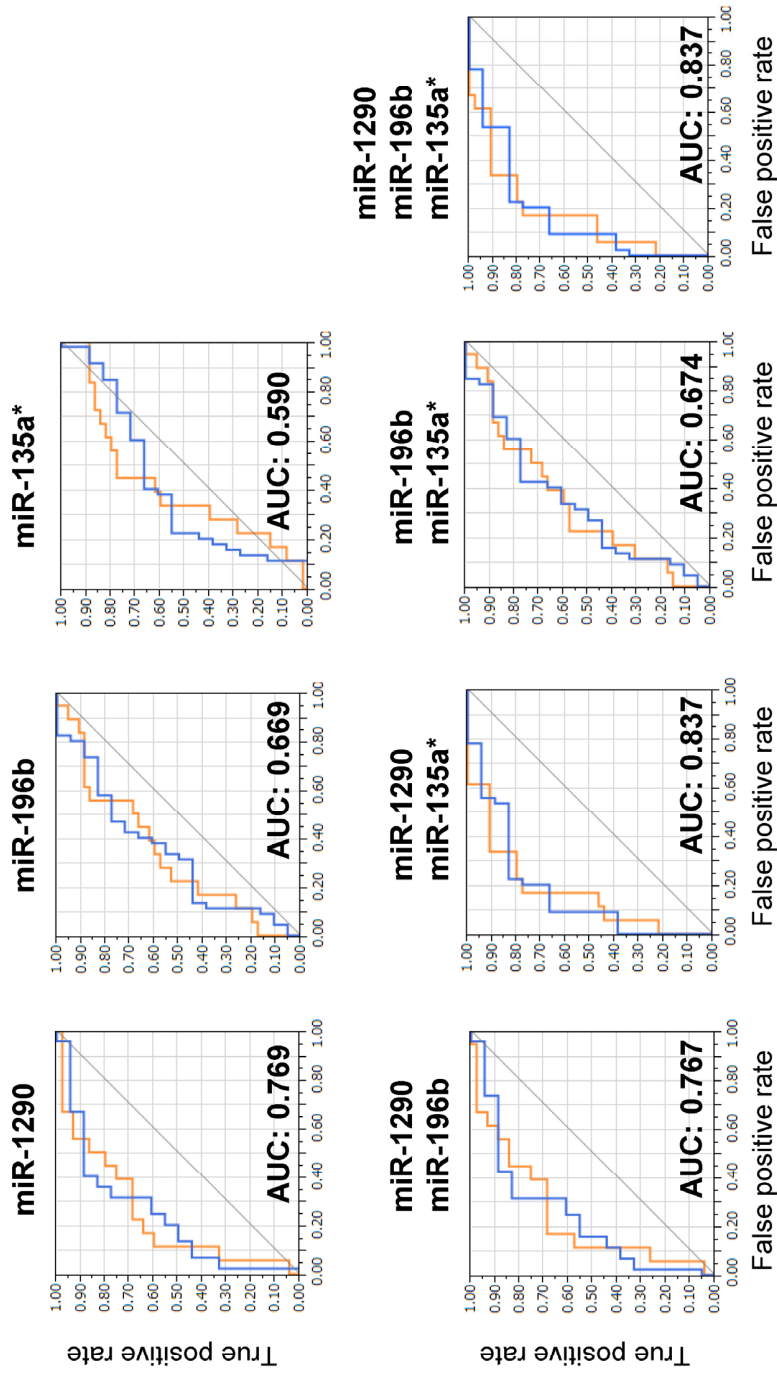

Supplemental Figure S3. Receiver operating characteristics (ROC) analysis was performed for miR-1290, miR-196b, and miR-135a\* in the validation cohort. The area under the curve (AUC) value is shown. The blue line represents the results for responders and the orange line represents the results for non-responders.
