# Supplementary material
Source: PubMed Central journal article supplement (PMC6329384)
Supplement: NIHMS1000546-supplement-Figure_4.pdf [file NIHMS1000546-supplement-Figure_4.pdf]

# Supplemental Figure S4.

Progression free survival  
by response

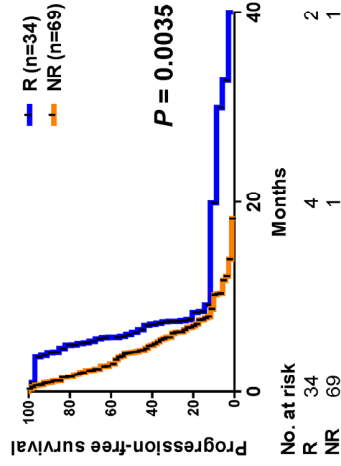

Progression free survival  
by three-miRNA signature prediction

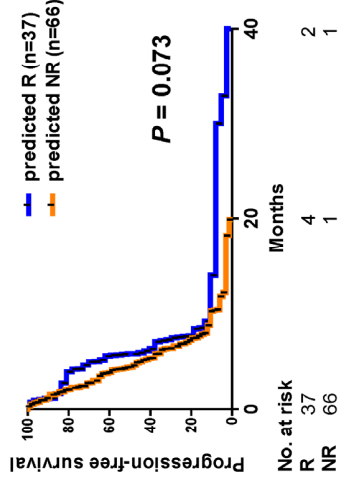

| HR (95% CI)      | P value | HR (95% CI)      | P value |
|------------------|---------|------------------|---------|
| 1.88 (1.23-2.94) | 0.0031  | 1.46 (0.97-2.24) | 0.070   |

Supplemental Figure S4. Progression-free survival of responders (R) and non-responders (NR) in all subjects (combined test and validation cohorts). The Kaplan-Meier log rank test was performed. Lower panel shows the results of Cox regression analysis. Hazard ratios (HRs) of (predicted) NR against (predicted) R are shown
