# Supplementary material
Source: PubMed Central journal article supplement (PMC6329384)
Supplement: NIHMS1000546-supplement-Table_1.pdf [file NIHMS1000546-supplement-Table_1.pdf]

**Supplemental Table S1. Clinicopathological characteristics of study populations**

|                                        | Test cohort (n=40)        |                               |                                |                                    | Validation cohort (n=63)  |                               |                                |                                    |
|----------------------------------------|---------------------------|-------------------------------|--------------------------------|------------------------------------|---------------------------|-------------------------------|--------------------------------|------------------------------------|
|                                        | True responders<br>(n=16) | True non-responders<br>(n=24) | Predicted responders<br>(n=15) | Predicted non-responders<br>(n=25) | True responders<br>(n=18) | True non-responders<br>(n=45) | Predicted responders<br>(n=20) | Predicted non-responders<br>(n=43) |
| Age-year                               |                           |                               |                                |                                    |                           |                               |                                |                                    |
| Mean (range)                           | 57.1 (47-66)              | 59.8 (49-68)                  | 56.7 (47-66)                   | 59.8 (49-67)                       | 58.3 (32-71)              | 59.7 (32-72)                  | 55.8 (32-67)                   | 60.9 (32-72)                       |
| Gender-no. (%)                         |                           |                               |                                |                                    |                           |                               |                                |                                    |
| Male                                   | 12 (75)                   | 11 (46)                       | 13 (87)                        | 10 (40)                            | 7 (39)                    | 21 (47)                       | 6 (30)                         | 22 (51)                            |
| Female                                 | 4 (25)                    | 13 (54)                       | 2 (13)                         | 15 (60)                            | 11 (61)                   | 24 (53)                       | 14 (70)                        | 21 (49)                            |
| Smoking (pack year)-no. (%)            |                           |                               |                                |                                    |                           |                               |                                |                                    |
| Never smoker                           | 4 (25)                    | 12 (50)                       | 2 (13)                         | 14 (56)                            | 10 (56)                   | 23 (51)                       | 8 (40)                         | 25 (58)                            |
| <20                                    | 1 (6)                     | 2 (8)                         | 2 (13)                         | 1 (4)                              | 5 (28)                    | 5 (11)                        | 6 (30)                         | 4 (9)                              |
| ≥20                                    | 11 (69)                   | 10 (42)                       | 11 (73)                        | 10 (40)                            | 3 (16)                    | 17 (38)                       | 6 (30)                         | 14 (33)                            |
| TP53 genotype-no. (%)                  |                           |                               |                                |                                    |                           |                               |                                |                                    |
| Arg/Arg                                | 6 (37)                    | 14 (59)                       | 8 (53)                         | 12 (48)                            | 6 (33)                    | 18 (40)                       | 5 (25)                         | 19 (44)                            |
| Arg/Pro                                | 7 (44)                    | 9 (37)                        | 6 (40)                         | 10 (40)                            | 10 (56)                   | 23 (51)                       | 11 (55)                        | 22 (51)                            |
| Pro/Pro                                | 3 (19)                    | 1 (4)                         | 1 (7)                          | 3 (12)                             | 2 (11)                    | 4 (9)                         | 4 (20)                         | 2 (5)                              |
| Driver-gene mutation-no. (%)           |                           |                               |                                |                                    |                           |                               |                                |                                    |
| negative                               | 6 (37)                    | 4 (16)                        | 5 (33)                         | 5 (20)                             | 7 (39)                    | 21 (47)                       | 8 (40)                         | 20 (47)                            |
| positive                               | 10 (63)                   | 20 (84)                       | 10 (67)                        | 20 (80)                            | 11 (61)                   | 24 (53)                       | 12 (60)                        | 23 (53)                            |
| EGFR mutation                          | 7                         | 12                            | 8                              | 11                                 | 8                         | 20                            | 10                             | 18                                 |
| KRAS mutation                          | 0                         | 3                             | 0                              | 3                                  | 3                         | 4                             | 2                              | 5                                  |
| HER2 mutation                          | 2                         | 1                             | 1                              | 2                                  | 0                         | 0                             | 0                              | 0                                  |
| BRAF mutation                          | 0                         | 1                             | 0                              | 1                                  | 0                         | 0                             | 0                              | 0                                  |
| ALK fusion                             | 1                         | 1                             | 1                              | 1                                  | NE                        | NE                            | NE                             | NE                                 |
| RET fusion                             | 0                         | 0                             | 0                              | 0                                  | NE                        | NE                            | NE                             | NE                                 |
| ROS1 fusion                            | 0                         | 2                             | 0                              | 2                                  | NE                        | NE                            | NE                             | NE                                 |
| TNM Stage at initial diagnosis-no. (%) |                           |                               |                                |                                    |                           |                               |                                |                                    |
| IA                                     | 0                         | 6 (25)                        | 0                              | 6 (24)                             | 1 (6)                     | 4 (9)                         | 2 (10)                         | 3 (7)                              |
| IB                                     | 3 (19)                    | 2 (8)                         | 1 (7)                          | 4 (16)                             | 5 (28)                    | 7 (16)                        | 4 (20)                         | 8 (19)                             |
| IIA                                    | 1 (6)                     | 3 (13)                        | 0                              | 4 (16)                             | 2 (11)                    | 8 (18)                        | 3 (15)                         | 7 (16)                             |
| IIB                                    | 1 (6)                     | 1 (4)                         | 1 (7)                          | 1 (4)                              | 1 (6)                     | 1 (2)                         | 0                              | 2 (5)                              |
| IIIA                                   | 11 (69)                   | 7 (29)                        | 12 (80)                        | 6 (24)                             | 7 (39)                    | 19 (42)                       | 8 (40)                         | 18 (42)                            |
| IIIB                                   | 0                         | 2 (8)                         | 1 (7)                          | 1 (4)                              | 0                         | 0                             | 0                              | 0                                  |
| IV                                     | 0                         | 3 (13)                        | 0                              | 3 (12)                             | 2 (11)                    | 6 (13)                        | 3 (15)                         | 5 (12)                             |
| TNM Stage at recurrence-no. (%)        |                           |                               |                                |                                    |                           |                               |                                |                                    |
| IA                                     | 0                         | 0                             | 0                              | 0                                  | 0                         | 0                             | 0                              | 0                                  |
| IB                                     | 0                         | 0                             | 0                              | 0                                  | 0                         | 0                             | 0                              | 0                                  |
| IIA                                    | 0                         | 0                             | 0                              | 0                                  | 0                         | 0                             | 0                              | 0                                  |
| IIB                                    | 0                         | 0                             | 0                              | 0                                  | 0                         | 0                             | 0                              | 0                                  |
| IIIA                                   | 0                         | 0                             | 0                              | 0                                  | 0                         | 0                             | 0                              | 0                                  |
| IIIB                                   | 0                         | 2 (8)                         | 0                              | 2 (8)                              | 0                         | 3 (7)                         | 1 (5)                          | 2 (5)                              |
| IV                                     | 16 (100)                  | 22 (92)                       | 15 (100)                       | 23 (92)                            | 18 (100)                  | 42 (93)                       | 19 (95)                        | 41 (95)                            |
| Recurrent portion-no. (%)              |                           |                               |                                |                                    |                           |                               |                                |                                    |
| local/regional                         | 0                         | 2 (8)                         | 0                              | 2 (8)                              | 0                         | 3 (7)                         | 1 (5)                          | 2 (5)                              |
| metastasis                             | 16 (100)                  | 22 (92)                       | 15 (100)                       | 23 (92)                            | 18 (100)                  | 42 (93)                       | 19 (95)                        | 41 (95)                            |
| M1a                                    | 9                         | 13                            | 8                              | 14                                 | 8                         | 20                            | 8                              | 20                                 |
| M1b                                    | 7                         | 9                             | 7                              | 9                                  | 10                        | 22                            | 11                             | 21                                 |
| Platinum-based regimens-no. (%)        |                           |                               |                                |                                    |                           |                               |                                |                                    |
| Platinum + Paclitaxel                  | 12 (75)                   | 18 (75)                       | 11 (73)                        | 19 (76)                            | 13 (72)                   | 29 (64)                       | 12 (60)                        | 30 (70)                            |
| Platinum + Gemcitabine                 | 3 (19)                    | 6 (25)                        | 4 (27)                         | 5 (20)                             | 3 (17)                    | 11 (25)                       | 7 (35)                         | 7 (16)                             |
| Platinum + Docetaxel                   | 0                         | 0                             | 0                              | 0                                  | 0                         | 4 (9)                         | 0                              | 4 (9)                              |
| Platinum + Pemetrexed                  | 0                         | 0                             | 0                              | 0                                  | 2 (11)                    | 0                             | 1 (5)                          | 1 (2)                              |
| Platinum + Vinorelbine                 | 1 (6)                     | 0                             | 0                              | 1 (4)                              | 0                         | 1 (2)                         | 0                              | 1 (2)                              |
| PS-no. (%)                             |                           |                               |                                |                                    |                           |                               |                                |                                    |
| 0                                      | 8 (50)                    | 10 (42)                       | 6 (40)                         | 12 (48)                            | 10 (56)                   | 19 (42)                       | 10 (50)                        | 19 (44)                            |
| 1                                      | 8 (50)                    | 13 (54)                       | 9 (60)                         | 12 (48)                            | 8 (44)                    | 24 (53)                       | 9 (45)                         | 23 (53)                            |
| 2                                      | 0                         | 0                             | 0                              | 0                                  | 0                         | 2 (4)                         | 1 (5)                          | 1 (2)                              |
| Unknown                                | 0                         | 1 (4)                         | 0                              | 1 (4)                              | 0                         | 0                             | 0                              | 0                                  |
| Frequency of cycle-no. (%)             |                           |                               |                                |                                    |                           |                               |                                |                                    |
| 1                                      | 0                         | 1 (4)                         | 0                              | 1 (4)                              | 1 (6)                     | 5 (11)                        | 2 (10)                         | 4 (9)                              |
| 2                                      | 0                         | 6 (25)                        | 1 (7)                          | 5 (20)                             | 1 (6)                     | 18 (40)                       | 4 (20)                         | 15 (35)                            |
| 3                                      | 1 (6)                     | 6 (25)                        | 1 (7)                          | 6 (24)                             | 0                         | 9 (20)                        | 2 (10)                         | 7 (16)                             |
| 4                                      | 13 (81)                   | 10 (42)                       | 11 (73)                        | 12 (48)                            | 14 (76)                   | 12 (27)                       | 9 (45)                         | 17 (40)                            |
| 5                                      | 0                         | 1 (4)                         | 0                              | 1 (4)                              | 1 (6)                     | 1 (2)                         | 2 (10)                         | 0                                  |
| 6                                      | 2 (13)                    | 0                             | 2 (13)                         | 0                                  | 1 (6)                     | 0                             | 1 (5)                          | 0                                  |
| RECIST-no. (%)                         |                           |                               |                                |                                    |                           |                               |                                |                                    |
| CR                                     | 1 (6)                     | 0                             | 1 (7)                          | 0                                  | 0                         | 0                             | 0                              | 0                                  |
| PR                                     | 15 (94)                   | 0                             | 11 (73)                        | 4 (16)                             | 18 (100)                  | 0                             | 12 (60)                        | 6 (14)                             |
| SD                                     | 0                         | 21 (87)                       | 2 (13)                         | 19 (76)                            | 0                         | 35 (78)                       | 4 (20)                         | 31 (72)                            |
| PD                                     | 0                         | 3 (13)                        | 1 (7)                          | 2 (8)                              | 0                         | 10 (22)                       | 4 (20)                         | 6 (14)                             |
| pre-treatment-no. (%)                  |                           |                               |                                |                                    |                           |                               |                                |                                    |
| Gefitinib                              | 3 (19)                    | 4 (16)                        | 3 (20)                         | 4 (16)                             | 1 (6)                     | 17 (38)                       | 5 (25)                         | 13 (30)                            |
| RT                                     | 2 (13)                    | 1 (4)                         | 3 (20)                         | 0                                  | 2 (11)                    | 1 (2)                         | 0                              | 3 (7)                              |
| Bone RT                                | 1 (6)                     | 0                             | 1 (7)                          | 0                                  | 1 (6)                     | 6 (13)                        | 2 (10)                         | 5 (12)                             |
| WBRT                                   | 2 (13)                    | 2 (8)                         | 2 (13)                         | 2 (8)                              | 1 (6)                     | 2 (4)                         | 2 (10)                         | 1 (2)                              |
| γ knife                                | 0                         | 1 (4)                         | 0                              | 1 (4)                              | 1 (6)                     | 2 (4)                         | 2 (10)                         | 1 (2)                              |

Abbreviations: Platinum, cisplatin or carboplatin; PD, performance status; CR, complete response; PR, partial response; SD, stable disease; PD, progressive disease; NE, not examined. RT, radiation therapy, WBRT, whole brain radiation therapy.
