# Supplementary material
Source: PubMed Central journal article supplement (PMC6329384)
Supplement: NIHMS1000546-supplement-Table_2.pdf [file NIHMS1000546-supplement-Table_2.pdf]

**Suppl emental Tabl e S2. Di fferenti ally expressed 59 mi RNAs betwee n responders and nonresponde rs**

| systemati c_name | now              | clustered mi RNAs                     | Regul ati on <sup>a</sup> | FC <sup>b</sup> | P val ue <sup>c</sup> |
|------------------|------------------|---------------------------------------|---------------------------|-----------------|-----------------------|
| hsa-mi R-135a*   | hsa-mi R-135a-3p |                                       | up                        | 10.8            | <0.0001               |
| hsa-mi R-196b    | hsa-mi R-196b-5p |                                       | up                        | 10.5            | 0.0065                |
| hsa-mi R-1181    |                  |                                       | up                        | 10.1            | 0.0025                |
| hsa-mi R-31      | hsa-mi R-31-5p   |                                       | up                        | 7.8             | 0.0478                |
| hsa-mi R-31*     | hsa-mi R-31-3p   |                                       | up                        | 7.2             | 0.0406                |
| hsa-mi R-1290    |                  |                                       | up                        | 6.0             | 0.0017                |
| hsa-mi R-642b    | hsa-mi R-642b-3p | hsa-mi R-642a                         | up                        | 4.7             | 0.0027                |
| hsa-mi R-3926    |                  | hsa-mi R-5692a-2                      | up                        | 4.5             | 0.0198                |
| hsa-mi R-1471    |                  |                                       | up                        | 4.1             | 0.0202                |
| hsa-mi R-3137    |                  |                                       | up                        | 4.0             | 0.0392                |
| hsa-mi R-630     |                  |                                       | up                        | 3.6             | 0.0117                |
| hsa-mi R-3667-5p |                  |                                       | up                        | 3.5             | 0.0424                |
| hsa-mi R-1246    |                  |                                       | up                        | 3.4             | 0.0025                |
| hsa-mi R-3934    | hsa-mi R-3934-5p |                                       | up                        | 3.0             | 0.0420                |
| hsa-mi R-3648    |                  | hsa-mi R-3687                         | up                        | 2.5             | 0.0253                |
| hsa-mi R-663     | hsa-mi R-663a    |                                       | up                        | 2.4             | 0.0014                |
| hsa-mi R-3663-3p |                  |                                       | up                        | 2.1             | 0.0145                |
| hsa-mi R-483-5p  |                  |                                       | up                        | 2.1             | 0.0476                |
| hsa-mi R-7       | hsa-mi R-7-5p    | hsa-mi R-1179, 3529                   | up                        | 2.1             | 0.0060                |
| hsa-mi R-18b     | hsa-mi R-18b-5p  | hsa-mi R-106a, 20b, 19b-2, 92a-2, 363 | up                        | 2.0             | 0.0075                |
| hsa-mi R-18a     | hsa-mi R-18a-5p  | hsa-mi R-17, 19a, 20a, 19b-1, 92a-1   | up                        | 1.9             | 0.0216                |
| hsa-mi R-130b    | hsa-mi R-130b-3p | hsa-mi R-301b                         | up                        | 1.8             | 0.0242                |
| hsa-mi R-4327    |                  |                                       | up                        | 1.6             | 0.0211                |
| hsa-mi R-150*    | hsa-mi R-150-3p  |                                       | up                        | 1.5             | 0.0295                |
| hsa-mi R-4271    |                  |                                       | up                        | 1.4             | 0.0469                |
| hsa-mi R-193a-3p |                  |                                       | up                        | 1.4             | 0.0178                |
| hsa-mi R-3195    |                  |                                       | up                        | 1.4             | 0.0474                |
| hsa-mi R-3198    |                  |                                       | up                        | 1.3             | 0.0396                |
| hsa-mi R-186     | hsa-mi R-186-5p  |                                       | down                      | -1.3            | 0.0341                |
| hsa-mi R-331-3p  |                  | hsa-mi R-3685                         | down                      | -1.3            | 0.0467                |
| hsa-mi R-30e     | hsa-mi R-30e-5p  | hsa-mi R-30c-1                        | down                      | -1.3            | 0.0456                |
| hsa-mi R-34a     | hsa-mi R-34a-5p  |                                       | down                      | -1.4            | 0.0294                |
| hsa-l et-7a      |                  |                                       | down                      | -1.4            | 0.0259                |
| hsa-mi R-24      | hsa-mi R-24-3p   |                                       | down                      | -1.4            | 0.0108                |
| hsa-mi R-26a     | hsa-mi R-26a-5p  |                                       | down                      | -1.4            | 0.0153                |
| hsa-mi R-30c     | hsa-mi R-30c-5p  |                                       | down                      | -1.4            | 0.0367                |
| hsa-mi R-30e*    | hsa-mi R-30e-3p  |                                       | down                      | -1.5            | 0.0250                |
| hsa-mi R-361-3p  |                  |                                       | down                      | -1.5            | 0.0091                |
| hsa-mi R-27b     | hsa-mi R-27b-3p  |                                       | down                      | -1.5            | 0.0252                |
| hsa-l et-7b      |                  |                                       | down                      | -1.5            | 0.0052                |
| hsa-mi R-23b     | hsa-mi R-23b-3p  |                                       | down                      | -1.6            | 0.0159                |
| hsa-mi R-497     | hsa-mi R-497-5p  |                                       | down                      | -1.8            | 0.0188                |
| hsa-mi R-29c     | hsa-mi R-29c-3p  |                                       | down                      | -1.8            | 0.0028                |
| hsa-mi R-195     | hsa-mi R-195-5p  |                                       | down                      | -1.8            | 0.0209                |
| hsa-mi R-29c*    | hsa-mi R-29c-5p  |                                       | down                      | -1.9            | 0.0019                |
| hsa-mi R-500a    | hsa-mi R-500a-5p |                                       | down                      | -2.2            | 0.0224                |
| hsa-mi R-34b*    | hsa-mi R-34b-5p  |                                       | down                      | -2.7            | 0.0028                |
| hsa-mi R-23b*    | hsa-mi R-23b-5p  | hsa-mi R-27b, 3074, 24-1              | down                      | -3.0            | 0.0456                |
| hsa-mi R-3065-5p |                  |                                       | down                      | -3.0            | 0.0120                |
| hsa-mi R-181c*   | hsa-mi R-181c-3p |                                       | down                      | -3.1            | 0.0463                |
| hsa-mi R-139-5p  |                  |                                       | down                      | -3.2            | 0.0206                |
| hsa-mi R-328     | hsa-mi R-328-3p  |                                       | down                      | -3.7            | 0.0086                |
| hsa-mi R-4291    |                  |                                       | down                      | -4.0            | 0.0448                |
| hsa-mi R-598     | hsa-mi R-598-3p  |                                       | down                      | -5.1            | 0.0036                |
| hsa-mi R-1       |                  | hsa-mi R-133a                         | down                      | -5.3            | 0.0329                |
| hsa-mi R-144*    | hsa-mi R-144-5p  |                                       | down                      | -5.4            | 0.0186                |
| hsa-mi R-628-5p  |                  |                                       | down                      | -7.2            | 0.0002                |
| hsa-mi R-449a    |                  |                                       | down                      | -7.3            | 0.0304                |
| hsa-mi R-34b     | hsa-mi R-34b-3p  |                                       | down                      | -12.9           | 0.0001                |

Shaded areas show differentially expressed mi RNAs with significant FC validated by qRT-PCR

<sup>a</sup>Up-Regulation is FC>1, down-regulation is FC<-1.

<sup>b</sup>Fold change (FC) is the ratio of mi RNAs expression in responders to non-responders.

<sup>c</sup>P value from Mann Whitney test.
