# Supplementary material
Source: PubMed Central journal article supplement (PMC6329384)
Supplement: NIHMS1000546-supplement-Table_3.pdf [file NIHMS1000546-supplement-Table_3.pdf]

Supplemental Table S3. Differentially expressed 12 miRNAs in responders compared with its non-responders

|             | Test cohort <sup>a</sup>  |                      |              |         | Validation cohort |         |
|-------------|---------------------------|----------------------|--------------|---------|-------------------|---------|
|             | Microarray                |                      | qRT-PCR      |         | qRT-PCR           |         |
|             | FC <sup>b</sup><br>(R/NR) | P value <sup>c</sup> | FC<br>(R/NR) | P value | FC<br>(R/NR)      | P value |
| mi R-135a*  | 10.765                    | < 0.0001             | 1.582        | 0.008   | 1.120             | NS      |
| mi R-196b   | 10.486                    | 0.006                | 6.533        | < 0.001 | 2.468             | 0.038   |
| mi R-1181   | 10.132                    | 0.003                | 1.341        | NS      |                   |         |
| mi R-31     | 7.762                     | 0.048                | 2.584        | NS      |                   |         |
| mi R-31*    | 7.238                     | 0.041                | 2.906        | NS      |                   |         |
| mi R-1290   | 6.017                     | 0.002                | 6.936        | < 0.001 | 2.115             | < 0.001 |
| mi R-598    | -5.071                    | 0.004                | -1.396       | NS      |                   |         |
| mi R-1      | -5.305                    | 0.033                | -1.695       | NS      |                   |         |
| mi R-144*   | -5.418                    | 0.019                | -1.195       | NS      |                   |         |
| mi R-628-5p | -7.184                    | < 0.001              | -1.048       | NS      |                   |         |
| mi R-449a   | -7.270                    | 0.030                | -2.401       | NS      |                   |         |
| mi R-34b    | -12.888                   | < 0.001              | -1.956       | NS      |                   |         |

<sup>a</sup>The expression level of miRNA by microarray was validated by qRT-PCR

<sup>b</sup>Fold change (FC) is the ratio of miRNAs expression in responders (R) to non-responder

<sup>c</sup>P value from Mann Whitney test. NS, not significant.
