# Supplementary material
Source: PubMed Central journal article supplement (PMC6329384)
Supplement: NIHMS1000546-supplement-Table_4.pdf [file NIHMS1000546-supplement-Table_4.pdf]

**Supplemental Table S4. The prediction value of the three-miRNA signature**

| Patients (n)            | Predicted responder | Predicted non-responder | Accuracy <sup>a</sup> (%) | Sensitivity <sup>b</sup> (%) | Specificity <sup>c</sup> (%) | Positive prediction value <sup>d</sup> (%) | Negative prediction value <sup>e</sup> (%) |
|-------------------------|---------------------|-------------------------|---------------------------|------------------------------|------------------------------|--------------------------------------------|--------------------------------------------|
| Test cohort             | (n=15)              | (n=25)                  |                           |                              |                              |                                            |                                            |
| True responder (16)     | 12                  | 4                       | 82.5                      | 66.7                         | 87.5                         | 80.0                                       | 84.0                                       |
| True non-responder (24) | 3                   | 21                      |                           |                              |                              |                                            |                                            |
| Validation cohort       | (n=20)              | (n=43)                  |                           |                              |                              |                                            |                                            |
| True responder (18)     | 12                  | 6                       | 77.8                      | 66.7                         | 82.2                         | 60.0                                       | 86.0                                       |
| True non-responder (45) | 8                   | 37                      |                           |                              |                              |                                            |                                            |

<sup>a</sup>Proportion of correctly predicted responders and non-responders among all patients.

<sup>b</sup>Proportion of correctly predicted responders among true responders.

<sup>c</sup>Proportion of correctly predict non-responders among true non-responders.

<sup>d</sup>Proportion of true responders among predicted responders.

<sup>e</sup>Proportion of true non-responders among predicted non-responders.
